# Supplementary material for: Eruptive history and 40 Ar∕ 39 Ar geochronology of the Milos volcanic field, Greece
Source: Copernicus journal article supplement (doi:10.5194/gchron-3-273-2021), 2021-05-05
Supplement: Supplementary file 1 [file gchron-3-273-2021-supplement.zip]

Archive with 5 entries (5 files):
- Supplementary material III.docx
- Supplementary material II-fusion data.xls
- gchron-3-273-2021-supplement-title-page.pdf
- Supplementary material I.docx
- Supplementary material II-incremental data.xls
