# Supplementary material for: Eruptive history and 40 Ar∕ 39 Ar geochronology of the Milos volcanic field, Greece
Source: Copernicus journal article supplement (doi:10.5194/gchron-3-273-2021), 2021-05-05
Supplement: Supplementary file 1 [file gchron-3-273-2021-supplement.zip › gchron-3-273-2021-supplement-title-page.pdf]

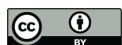

*Supplement of*

**Eruptive history and  $^{40}\text{Ar} / ^{39}\text{Ar}$  geochronology of the Milos volcanic field, Greece**

**Xiaolong Zhou et al.**

*Correspondence to:* Xiaolong Zhou (z.x.l.zhou@vu.nl) and Pieter Vroon (p.z.vroon@vu.nl)

- gchron-3-273-2021-supplement-title-page.pdf
- Supplementary material I.docx
- Supplementary material II-fusion data.xls
- Supplementary material II-incremental data.xls
- Supplementary material III.docx

The copyright of individual parts of the supplement might differ from the article licence.
