# Supplementary material for: Eruptive history and 40 Ar∕ 39 Ar geochronology of the Milos volcanic field, Greece
Source: Copernicus journal article supplement (doi:10.5194/gchron-3-273-2021), 2021-05-05
Supplement: Supplementary file 1 [file gchron-3-273-2021-supplement.zip › Supplementary material I.docx]

The images of outcrop and rock texture from the island of Milos


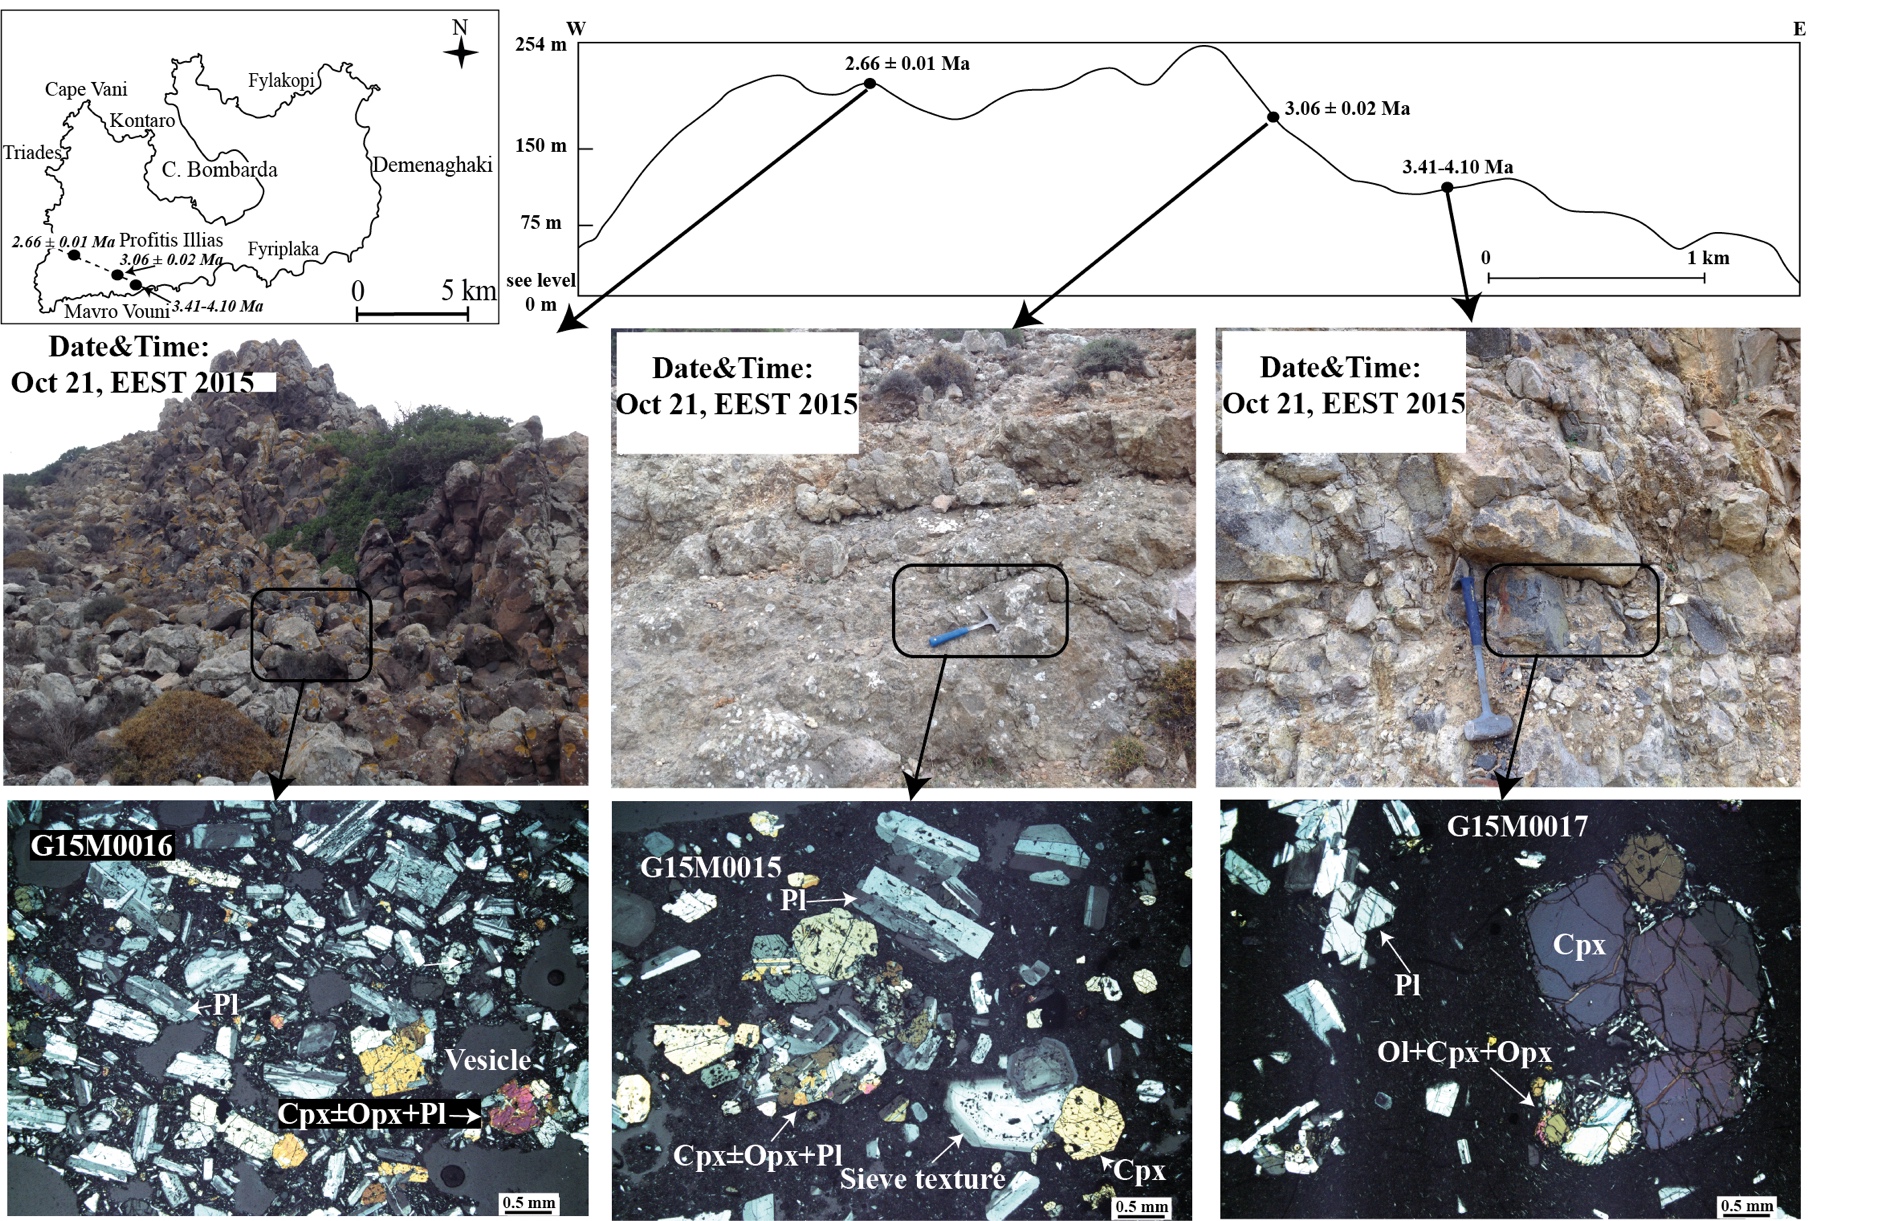


## Figure S1.1. The outcrops and thin sections for sample G15M0015-17 (2.66-4.10 Ma) are from the southwest of Milos.


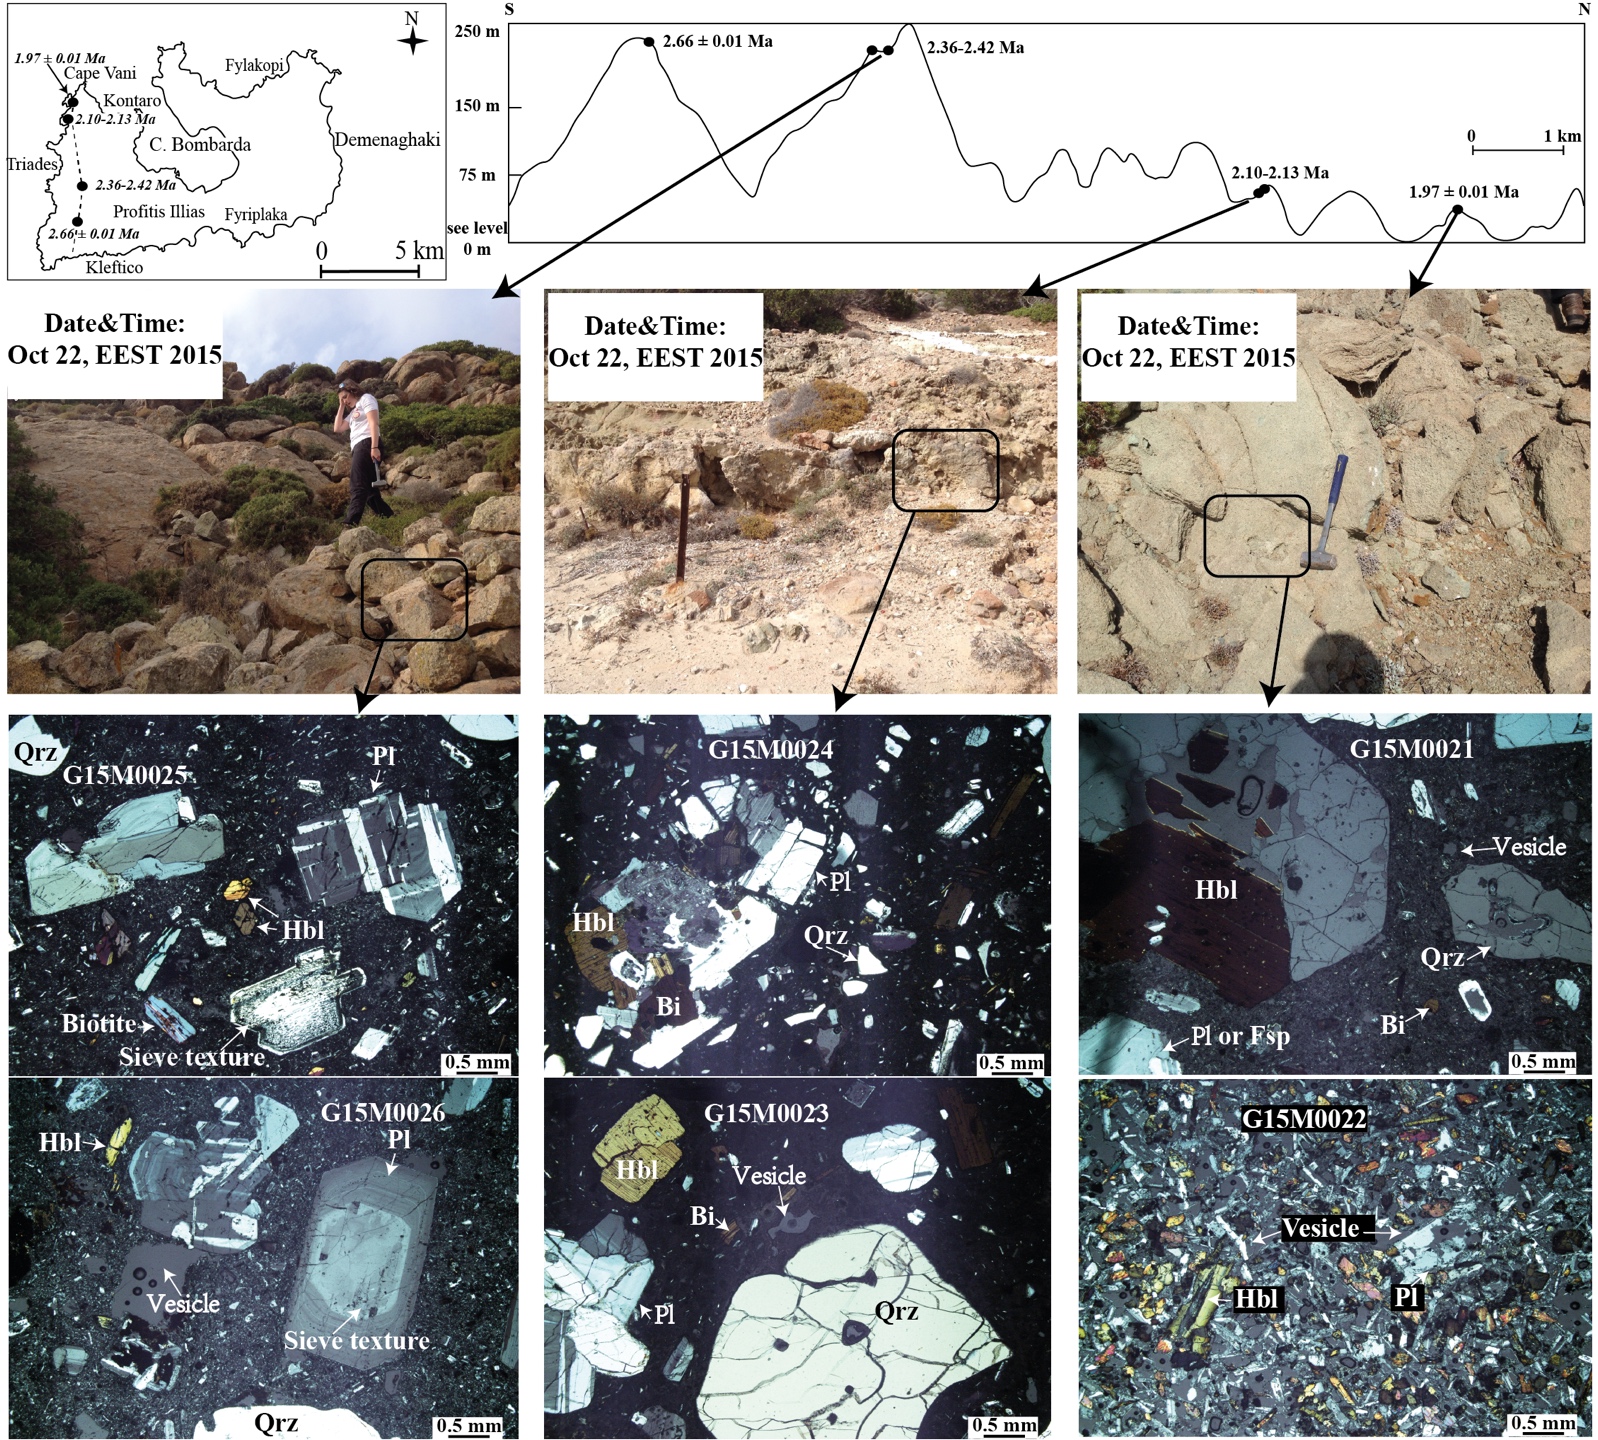


## Figure S1.2. The outcrops and thin sections for sample G15M0021-26 (1.97-2.42 Ma) are from the west-northwest of Milos.


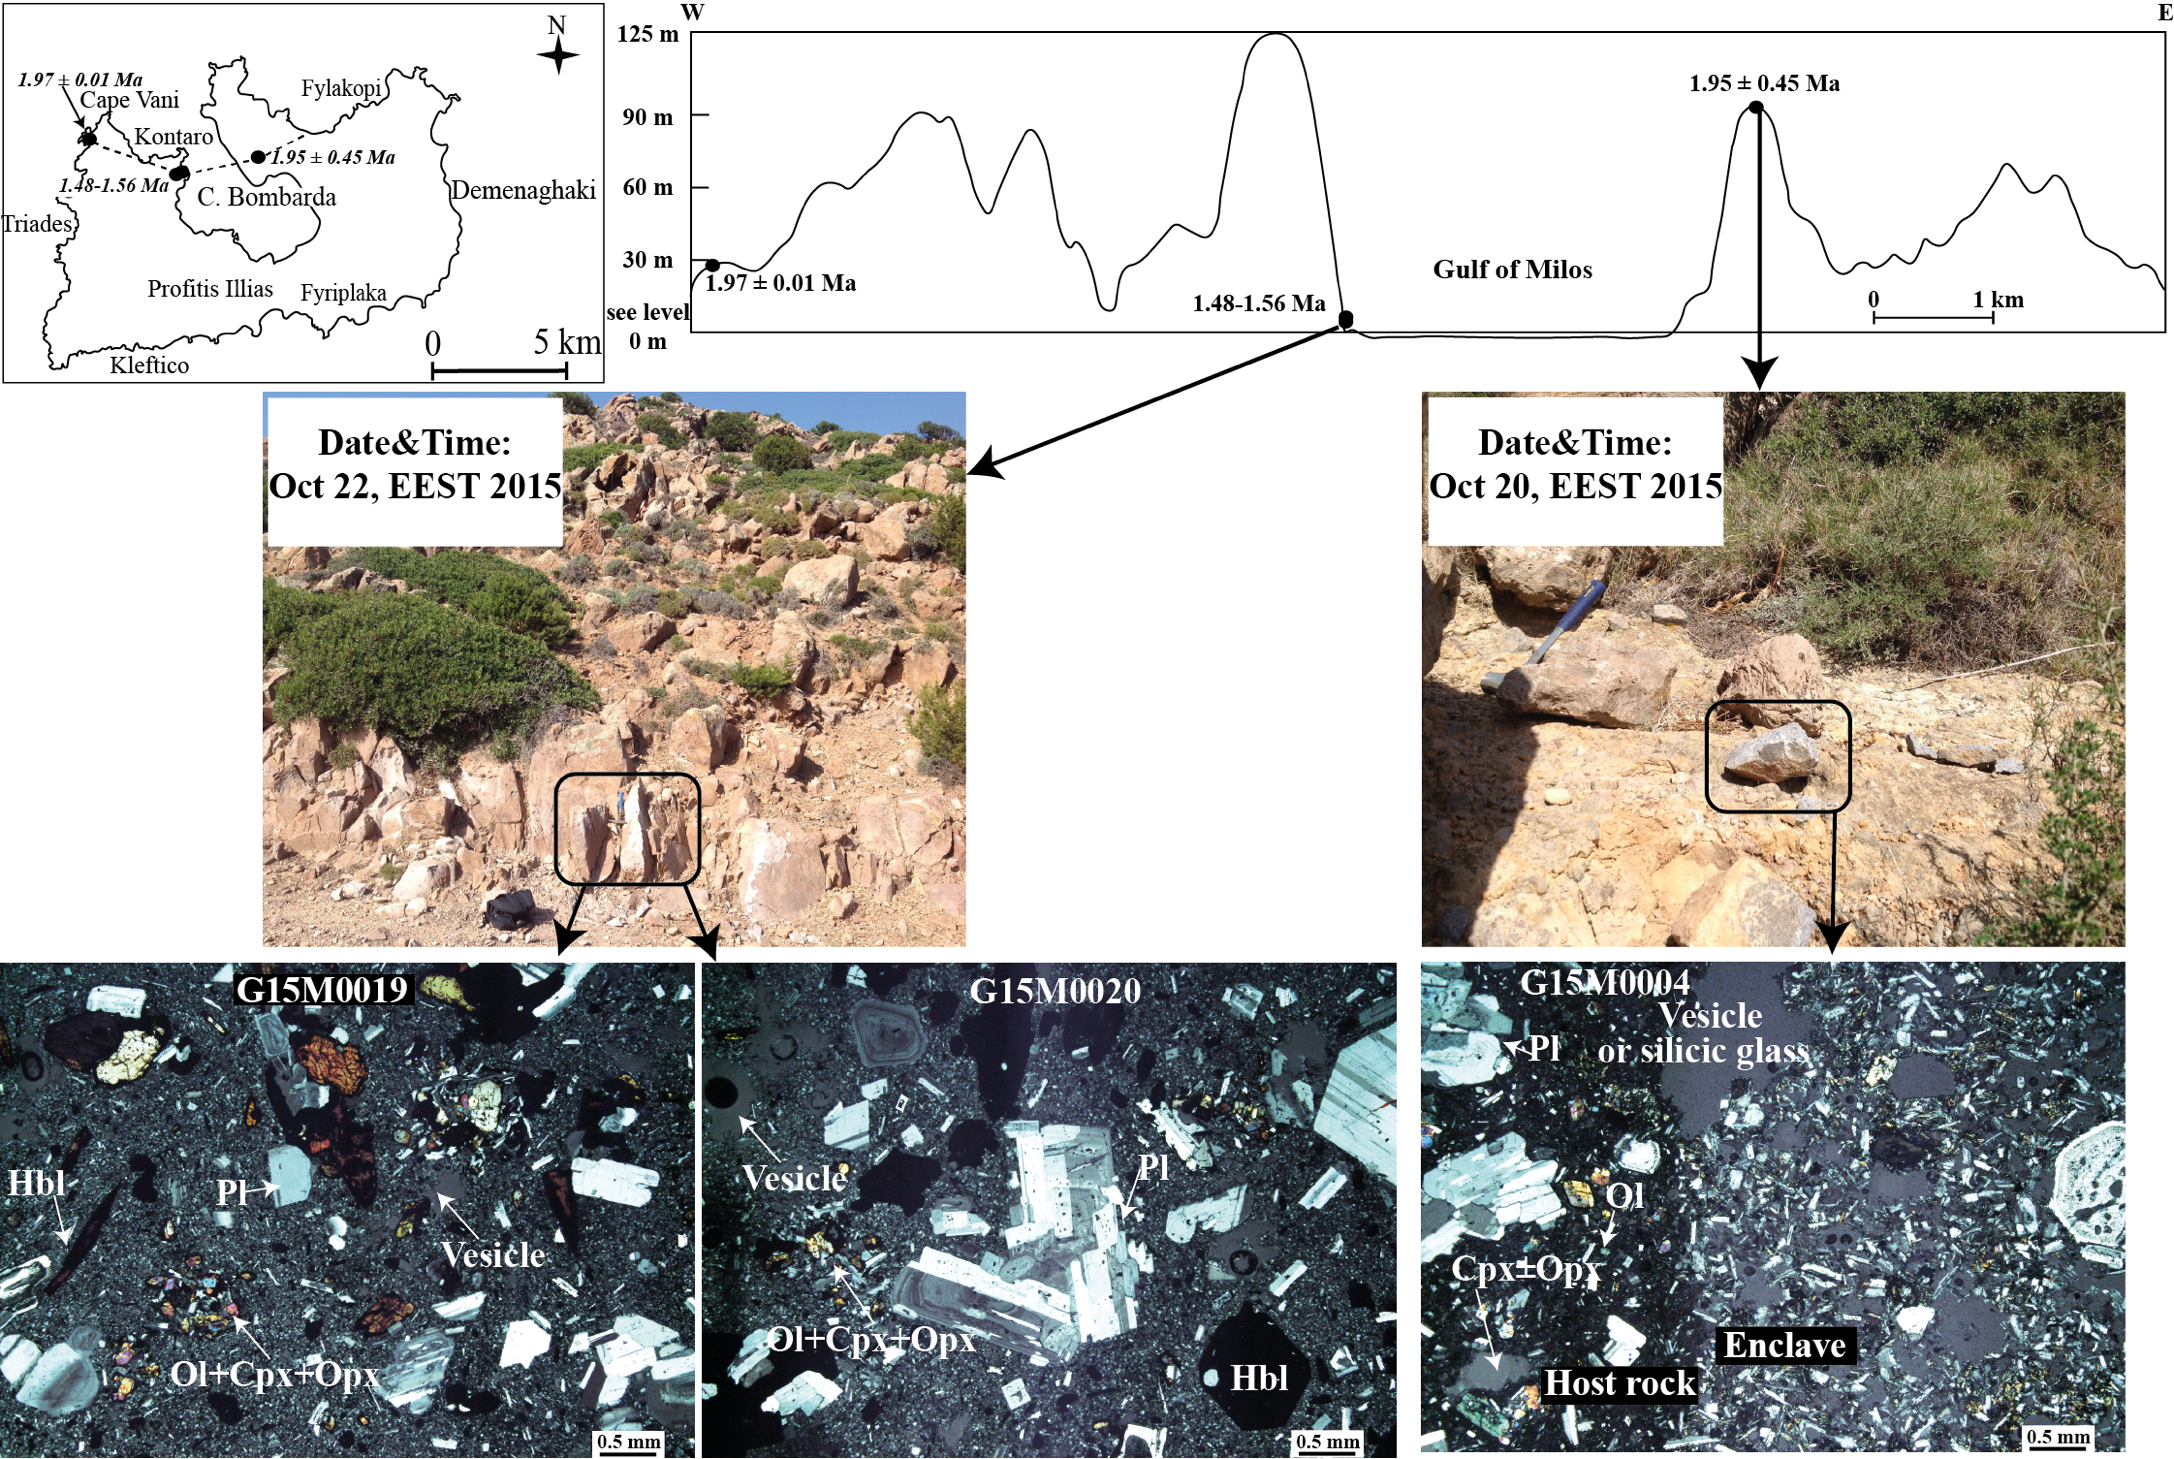


## Figure S1.3. The outcrops and thin sections for sample G15M0019-20 (1.48-1.56 Ma) and G15M0004 (1.95 ± 0.45 Ma) are from the northwest-north of Milos.


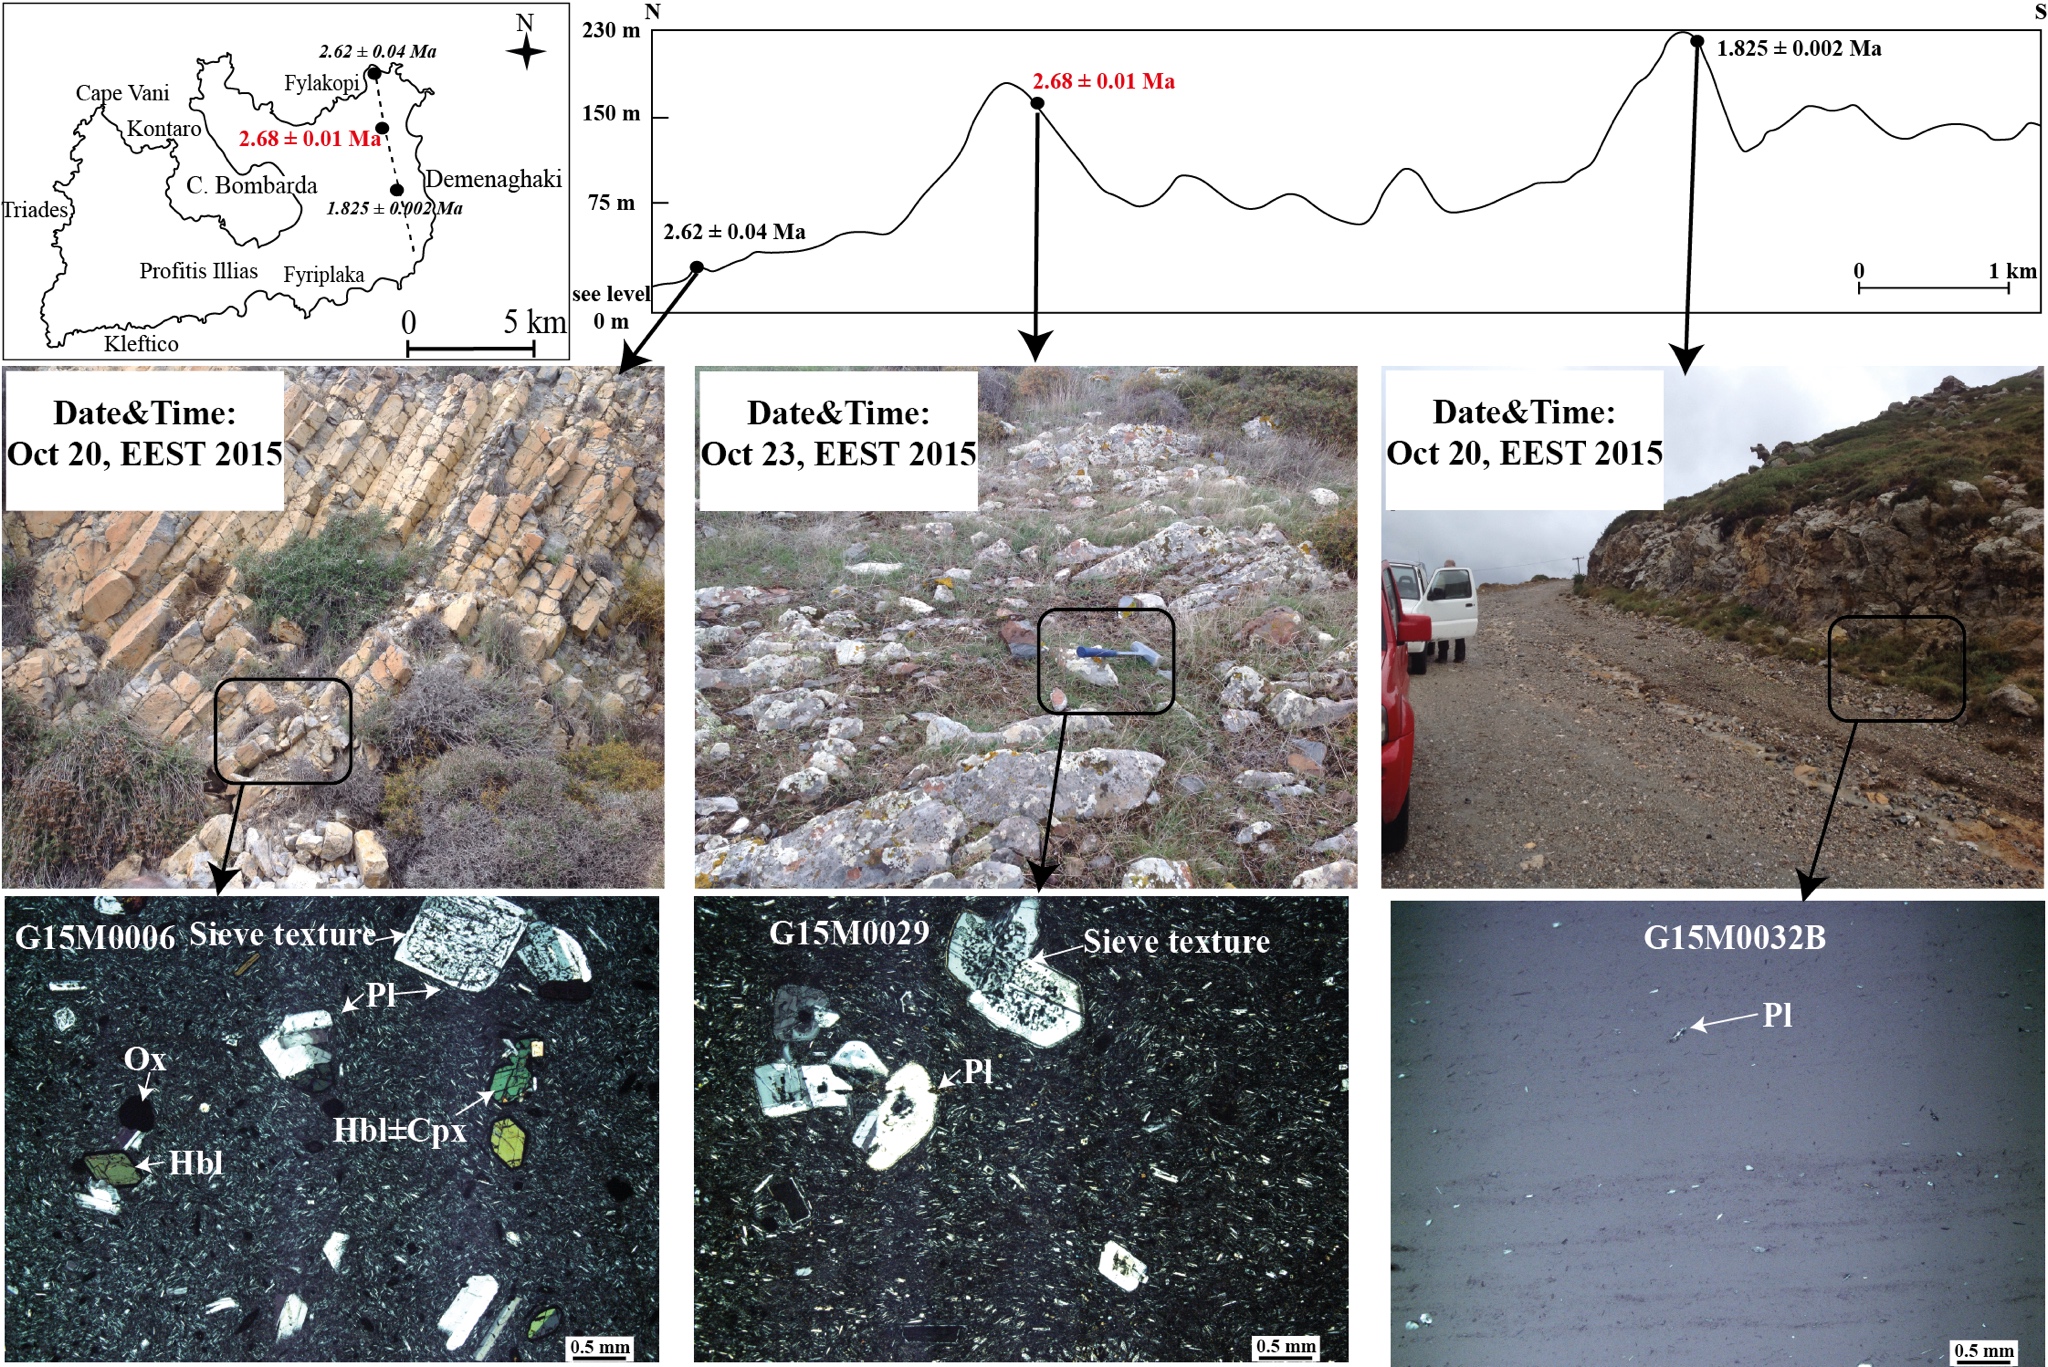


## Figure S1.4. The outcrops and thin sections for sample G15M0006(2.62 ± 0.04 Ma), G15M0029 (2.68 ± 0.01 Ma) and G15M0032B (1.825 ± 0.002 Ma) are from the northeast-east of Milos. The number in red indicates an age which is discarded in this study. See details in main text.


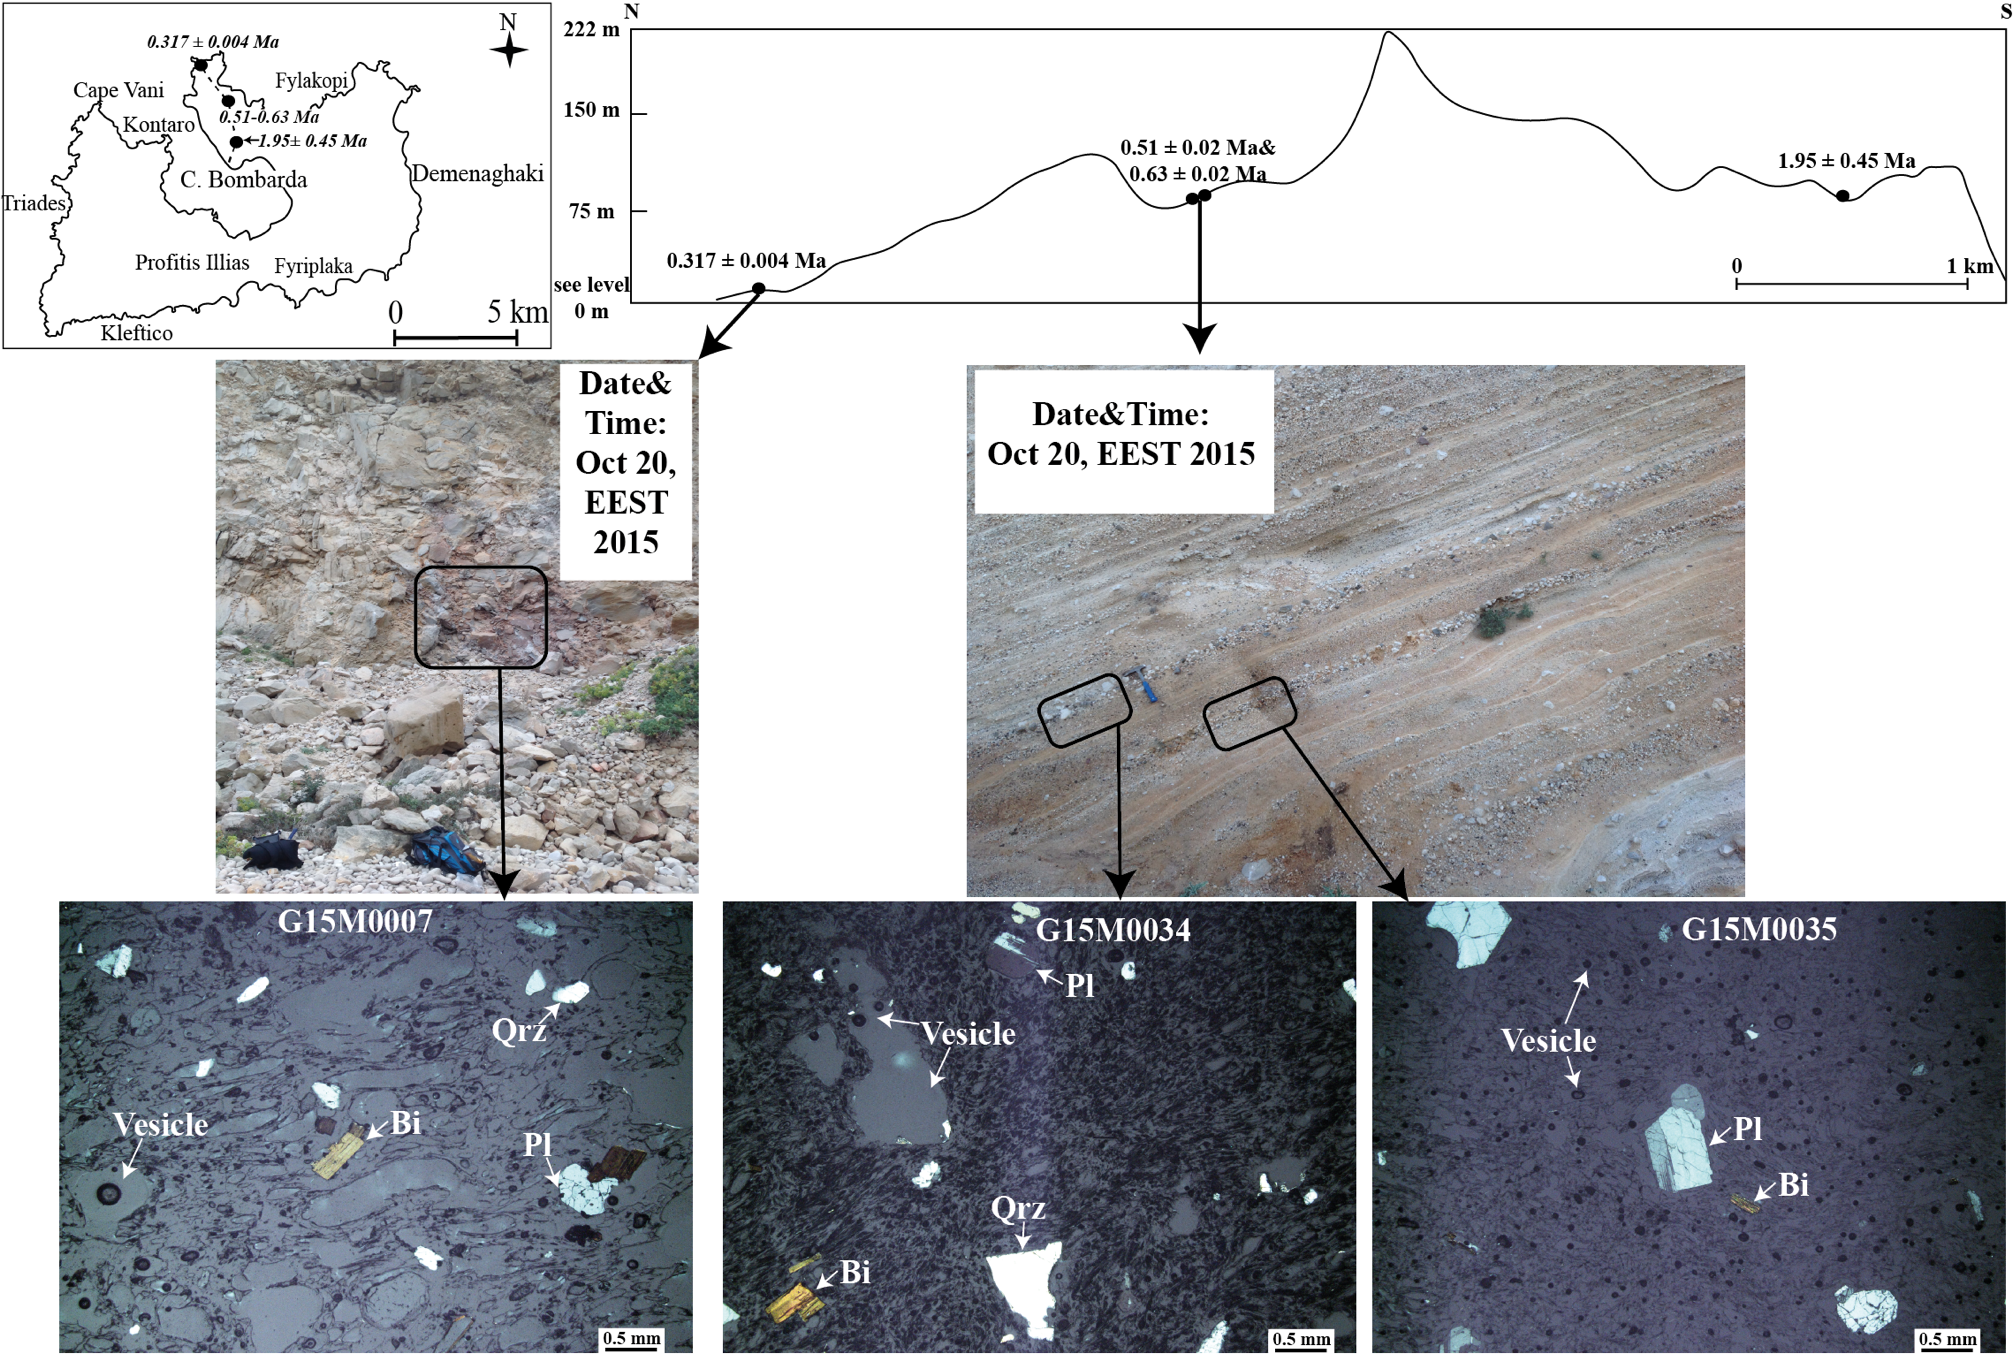


## Figure S1.5. The outcrops and thin sections for sample G15M0034-35 (0.51-0.63 Ma) and G15M0007 (0.317 ± 0.004 Ma) are from the north most of Milos.


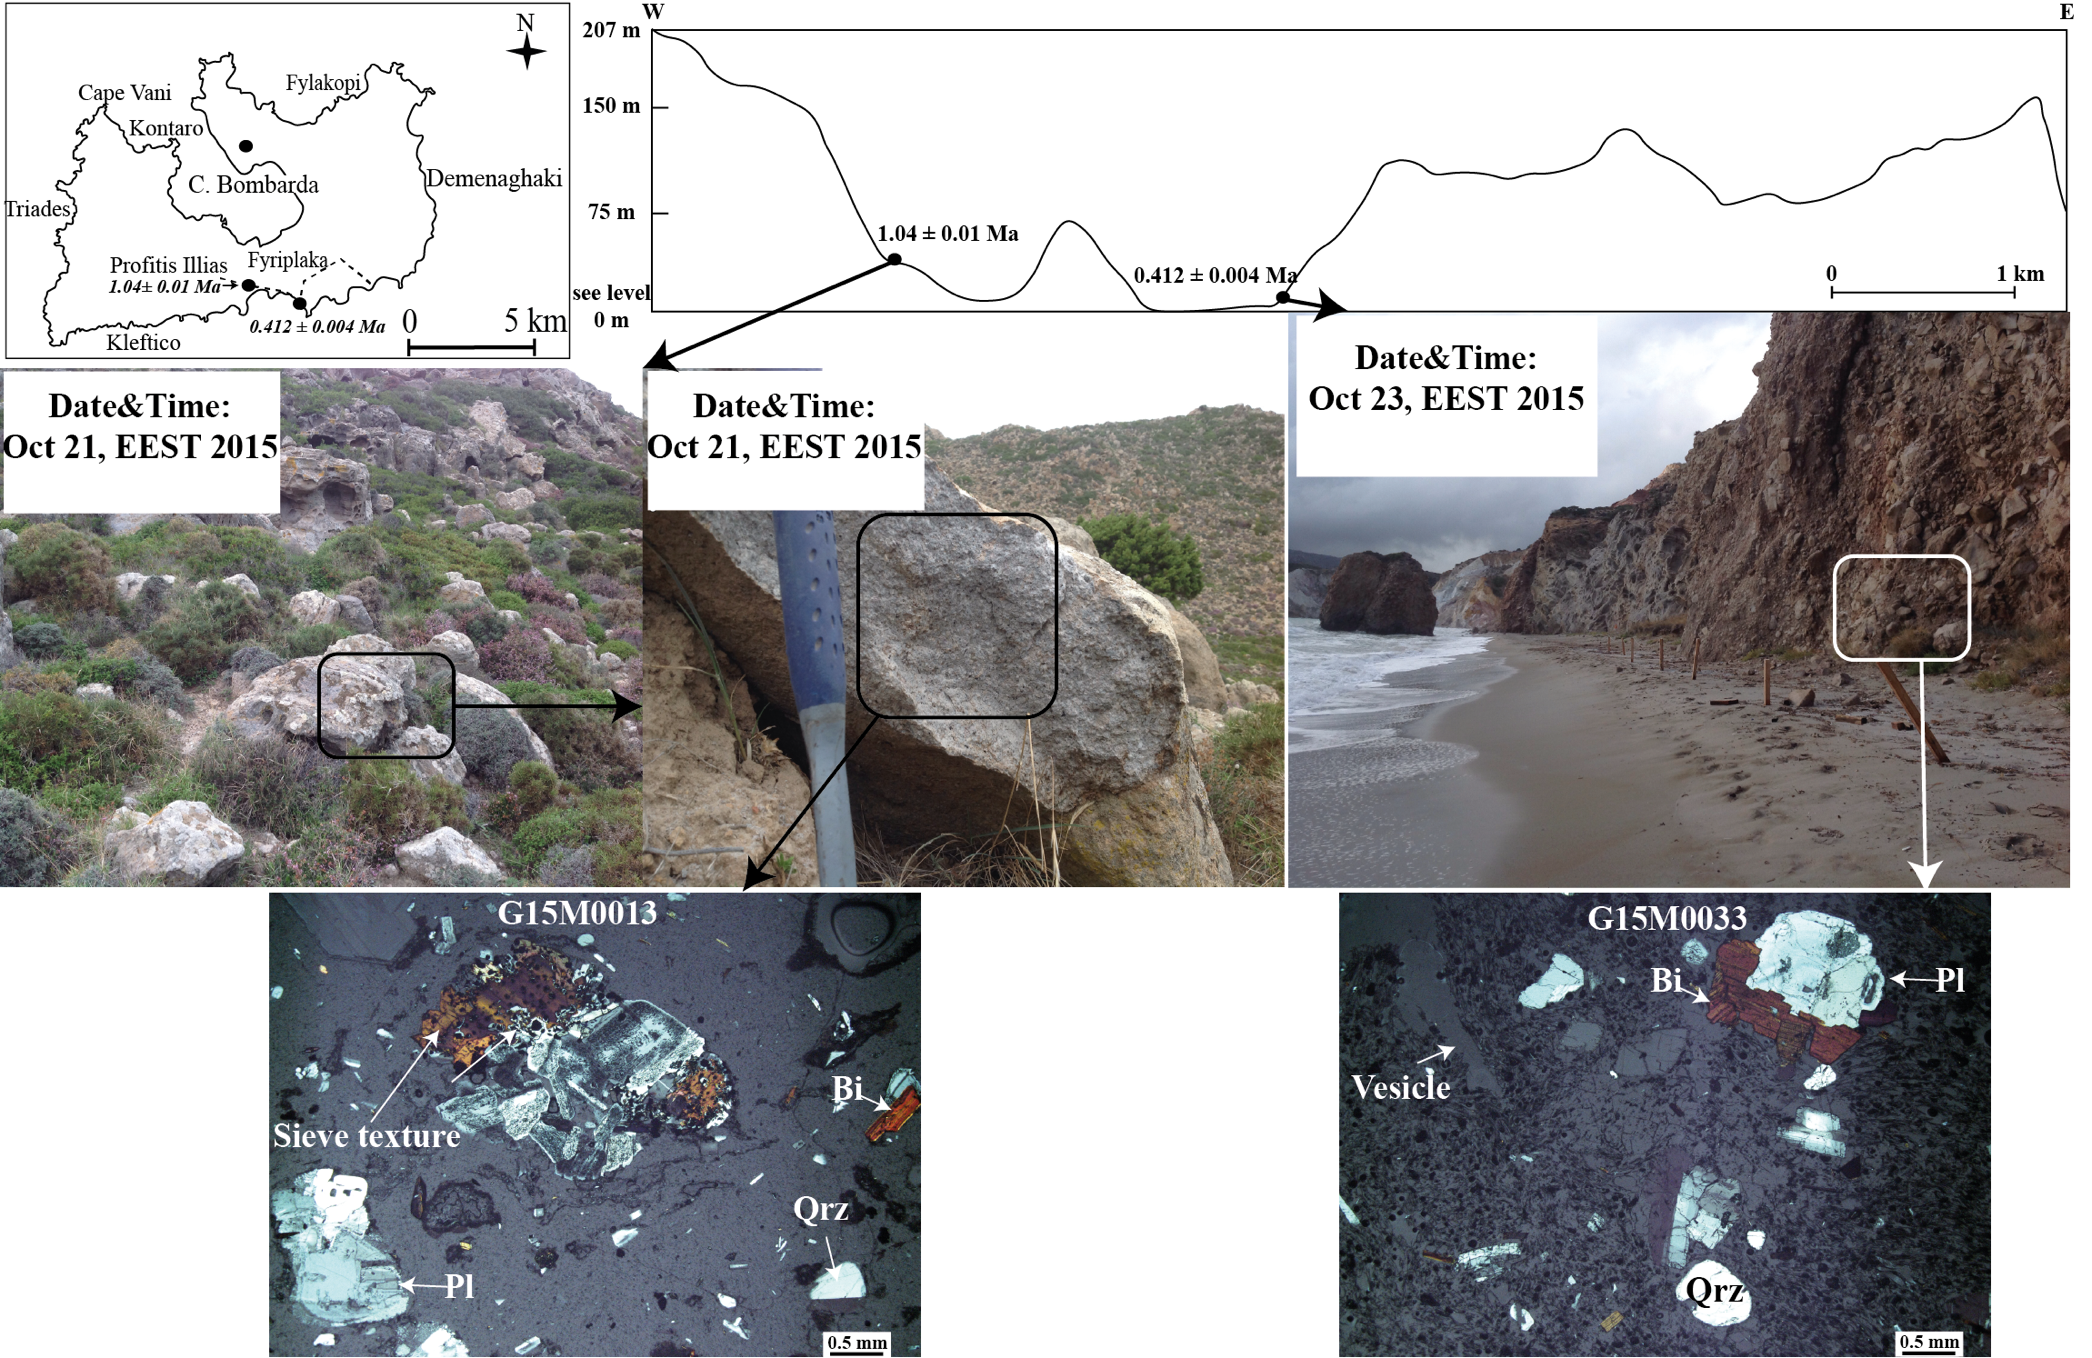


## Figure S1.6. The outcrops and thin sections for sample G15M0013 (1.04 ± 0.01 Ma) and G15M0033 (0.412 ± 0.004 Ma), respectively, are from Halepa lava cone and Tsigrado tuff cone in the south of Milos.


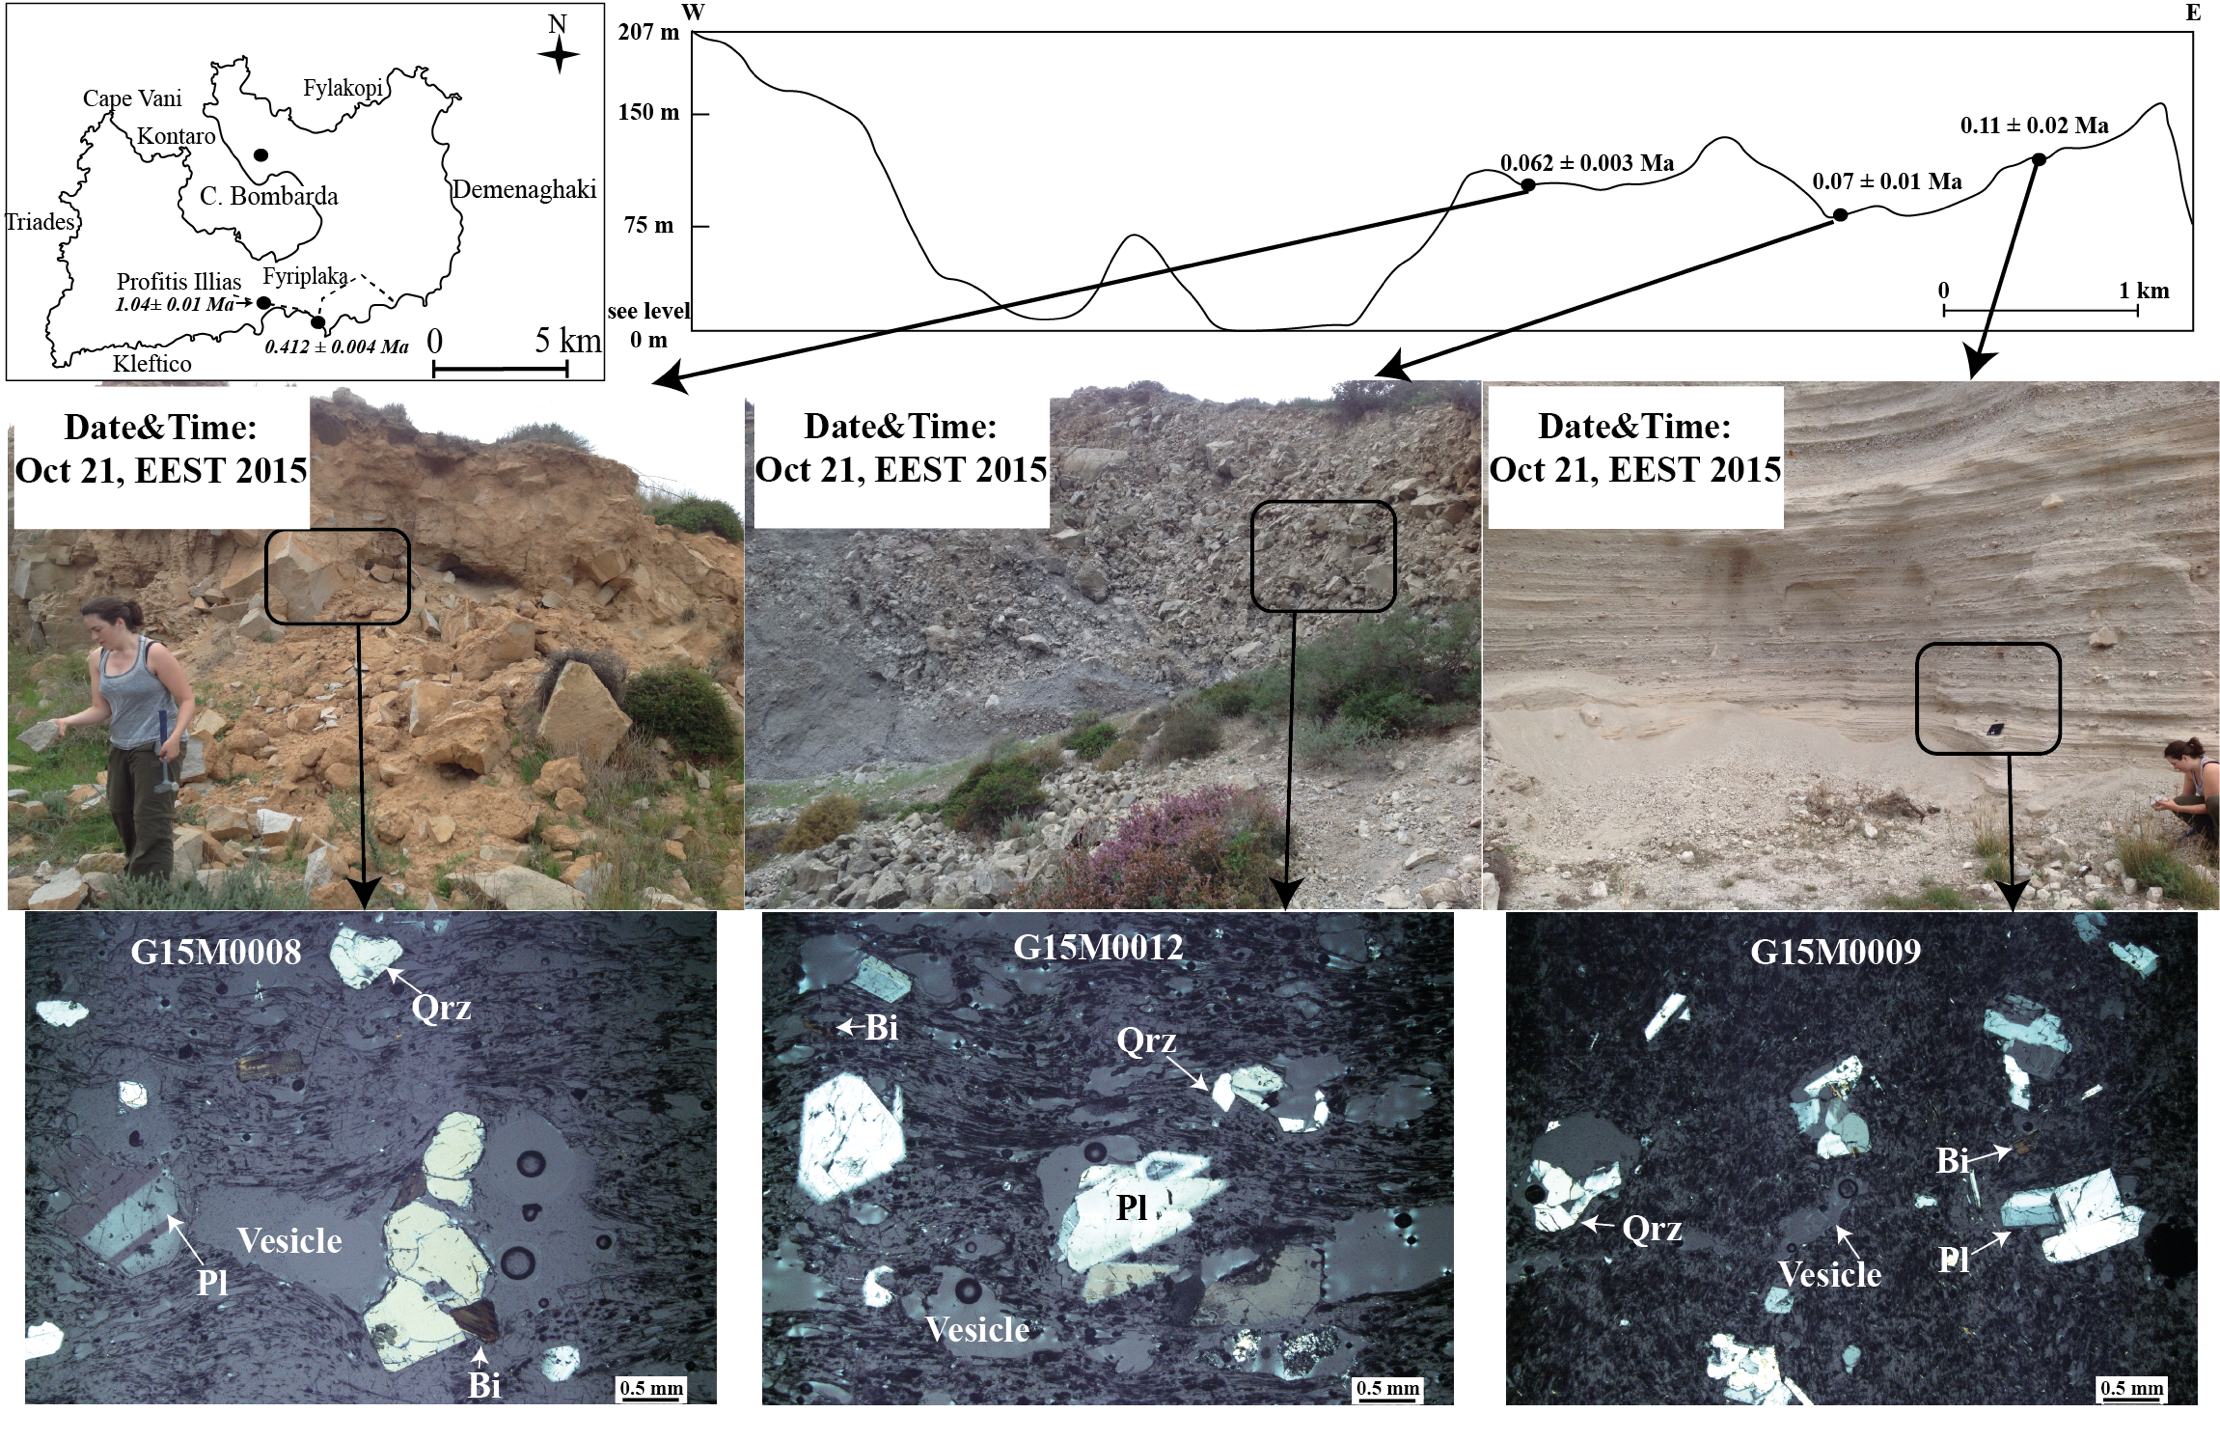


## Figure S1.7. The outcrops and thin sections for sample G15M0008-9 and G15M0012 (0.06-0.11 Ma) are from different tuff-ring layers of Fyriplaka tuff cone in the south of Milos.
