# Supplementary material for: Eruptive history and 40 Ar∕ 39 Ar geochronology of the Milos volcanic field, Greece
Source: Copernicus journal article supplement (doi:10.5194/gchron-3-273-2021), 2021-05-05
Supplement: Supplementary file 1 [file gchron-3-273-2021-supplement.zip › Supplementary material III.docx]

**Table S2.1. Run conditions of the AxiosMax WD-XRF**

|  |  |  |  | **Background Offset** | |  |  |  |  |  |  |  | | **PHD** | | **Counting Time** | |
| --- | --- | --- | --- | --- | --- | --- | --- | --- | --- | --- | --- | --- | --- | --- | --- | --- | --- |
| **Element** | **Sample** | **Line** | **Angle (2Th)** | **Bg1** | **Bg2** | **Tube** | **KV** | **mA** | **Tube Filter** | **Collimator** | **Crystal** | | **Detector** | **LL** | **UL** | **Peak** | **Bg** |
| **Fe** | Bead | KA | 57.5344 | - | 1.5000 | Rh | 40 | 90 | No | 100 | LiF 200 | | Duplex | 35 | 70 | 20 | 20 |
| **Mn** | Bead | KA | 62.9922 | -1.5000 | 1.5000 | Rh | 40 | 90 | No | 300 | LiF 200 | | Duplex | 35 | 70 | 240 | 240 |
| **Ti** | Bead | KA | 86.1786 | -1.2000 | 2.6000 | Rh | 40 | 90 | No | 300 | LiF 200 | | Flow | 30 | 70 | 60 | 120 |
| **Ca** | Bead | KA | 113.1368 | -3.1600 | - | Rh | 40 | 90 | No | 300 | LiF 200 | | Flow | 34 | 68 | 60 | 60 |
| **K** | Bead | KA | 136.7132 | -5.0000 | 4.0000 | Rh | 40 | 90 | No | 300 | LiF 200 | | Flow | 32 | 72 | 120 | 120 |
| **P** | Bead | KA | 140.9872 | -6.0000 | 2.5000 | Rh | 40 | 90 | No | 300 | Ge 111 | | Flow | 36 | 70 | 120 | 120 |
| **Si** | Bead | KA | 109.1064 | - | 4.0000 | Rh | 40 | 90 | No | 300 | PE 002 | | Flow | 30 | 75 | 30 | 60 |
| **Al** | Bead | KA | 144.9052 | -5.0000 | - | Rh | 40 | 90 | No | 300 | PE 002 | | Flow | 30 | 78 | 60 | 60 |
| **Mg** | Bead | KA | 22.0352 | -1.6000 | 2.0000 | Rh | 40 | 90 | No | 100 | PX1 | | Flow | 28 | 66 | 240 | 240 |
| **Na** | Bead | KA | 26.6148 | -1.5000 | 1.5000 | Rh | 40 | 90 | No | 300 | PX1 | | Flow | 28 | 66 | 240 | 240 |
| **Ba** | Bead | LA | 87.1496 | -2.1500 | 1.7000 | Rh | 40 | 90 | No | 300 | LiF 200 | | Flow | 30 | 65 | 240 | 240 |
| **Mo** | Pressed Powder | KA | 20.2800 | - | 0.7000 | Rh | 60 | 60 | No | 100 | LiF 200 | | Scint. | 28 | 70 | 300 | 300 |
| **Nb** | Pressed Powder | KA | 21.3750 | -0.3950 | 1.8000 | Rh | 60 | 60 | No | 100 | LiF 200 | | Scint. | 28 | 70 | 300 | 240 |
| **Zr** | Pressed Powder | KA | 22.5000 | Nb Bg1 | Nb Bg2 | Rh | 60 | 60 | No | 100 | LiF 200 | | Scint. | 28 | 70 | 300 | 240 |
| **Y** | Pressed Powder | KA | 23.7500 | -0.5750 | 0.9500 | Rh | 60 | 60 | No | 100 | LiF 200 | | Scint. | 28 | 70 | 300 | 240 |
| **Sr** | Pressed Powder | KA | 25.1060 | Y Bg2 | 0.5940 | Rh | 60 | 60 | No | 100 | LiF 200 | | Scint. | 28 | 70 | 300 | 240 |
| **U** | Pressed Powder | LA | 26.1250 | Sr Bg2 | Rb Bg2 | Rh | 60 | 60 | No | 100 | LiF 200 | | Scint. | 28 | 70 | 300 | 240 |
| **Rb** | Pressed Powder | KA | 26.5730 | Sr Bg2 | 0.4770 | Rh | 60 | 60 | No | 100 | LiF 200 | | Scint. | 28 | 70 | 300 | 240 |
| **Th** | Pressed Powder | LA | 27.4500 | Rb Bg2 | Pb Bg2 | Rh | 60 | 60 | No | 100 | LiF 200 | | Scint. | 28 | 70 | 300 | 240 |
| **Pb** | Pressed Powder | LB1 | 28.2350 | Rb Bg2 | 0.3650 | Rh | 60 | 60 | No | 100 | LiF 200 | | Scint. | 28 | 70 | 300 | 240 |
| **Ga** | Pressed Powder | KA | 38.9000 | -2.1600 | 0.5800 | Rh | 60 | 60 | No | 300 | LiF 200 | | Duplex | 37 | 63 | 300 | 300 |
| **Zn** | Pressed Powder | KA | 41.7800 | -0.8800 | 0.7200 | Rh | 60 | 60 | No | 300 | LiF 200 | | Duplex | 37 | 63 | 300 | 300 |
| **W** | Pressed Powder | LA | 43.0100 | Zn Bg2 | Ni Bg1 | Rh | 60 | 60 | No | 300 | LiF 200 | | Duplex | 37 | 63 | 300 | 300 |
| **Ta** | Pressed Powder | LA | 44.4100 | Ni Bg1 | Ni Bg2 | Rh | 60 | 60 | No | 300 | LiF 200 | | Duplex | 37 | 63 | 300 | 300 |
| **Cu** | Pressed Powder | KA | 45.0100 | Ni Bg1 | Ni Bg2 | Rh | 60 | 60 | No | 300 | LiF 200 | | Duplex | 37 | 63 | 300 | 300 |
| **Hf** | Pressed Powder | LA | 45.8700 | Ni Bg1 | Ni Bg2 | Rh | 60 | 60 | No | 300 | LiF 200 | | Duplex | 37 | 63 | 300 | 300 |
| **Er** | Pressed Powder | LB1 | 46.4200 | Ni Bg1 | Ni Bg2 | Rh | 60 | 60 | No | 300 | LiF 200 | | Duplex | 37 | 63 | 300 | 300 |
| **Ni** | Pressed Powder | KA | 48.6500 | -5.2500 | 1.2500 | Rh | 60 | 60 | No | 300 | LiF 200 | | Duplex | 37 | 63 | 300 | 300 |
| **Yb** | Pressed Powder | LA | 49.0600 | Ni Bg1 | Ni Bg2 | Rh | 60 | 60 | No | 300 | LiF 200 | | Duplex | 37 | 63 | 300 | 300 |
| **Dy** | Pressed Powder | LB1 | 50.2700 | Ni Bg1 | Ni Bg2 | Rh | 60 | 60 | No | 300 | LiF 200 | | Duplex | 37 | 63 | 300 | 300 |
| **La** | Pressed Powder | LA | 82.9228 | -0.8000 | 1.1000 | Rh | 60 | 60 | No | 300 | LiF 200 | | Flow | 35 | 65 | 300 | 150 |
| **Ce** | Pressed Powder | LB1 | 71.5926 | -0.8000 | - | Rh | 60 | 60 | No | 300 | LiF 200 | | Duplex | 35 | 65 | 300 | 300 |
| **Pr** | Pressed Powder | LB1 | 68.2256 | - | 0.4200 | Rh | 60 | 60 | No | 300 | LiF 200 | | Duplex | 35 | 65 | 300 | 300 |
| **Nd** | Pressed Powder | LB1 | 65.0930 | -0.5000 | 0.6500 | Rh | 60 | 60 | No | 300 | LiF 200 | | Duplex | 35 | 65 | 300 | 150 |
| **Sm** | Pressed Powder | LA | 66.2442 | -0.4000 | - | Rh | 60 | 60 | No | 300 | LiF 200 | | Duplex | 35 | 65 | 300 | 300 |
| **V** | Pressed Powder | KA | 123.1798 | -2.3700 | 8.8300 | Rh | 60 | 60 | No | 300 | LiF 220 | | Duplex | 28 | 75 | 300 | 200 |
| **Cr** | Pressed Powder | KA | 107.1280 | -1.4100 | 2.8900 | Rh | 60 | 60 | No | 300 | LiF 220 | | Duplex | 30 | 66 | 300 | 200 |
| **Co** | Pressed Powder | KA | 77.8710 | -3.3900 | - | Rh | 60 | 60 | No | 300 | LiF 220 | | Duplex | 36 | 66 | 300 | 300 |
| **Sc** | Pressed Powder | KA | 97.7000 | -7.7000 | -2.7000 | Rh | 60 | 60 | No | 300 | LiF 200 | | Flow | 25 | 75 | 300 | 200 |

**Table S2.2a. Precision and accuracy of major-elements measured by WD-XRF.**

|  |  |  | **AGV-2** |  |  |  |  |  |  | **BCR-2** |  |  |  |
| --- | --- | --- | --- | --- | --- | --- | --- | --- | --- | --- | --- | --- | --- |
|  | **Average (N samples)** | **St. Dev.** | **Recommended value** | **CV (%)** | **Delta (%)** | **N** |  | **Average (N samples)** | **St. Dev.** | **Recommended value** | **CV (%)** | **Delta (%)** | **N** |
| **Fe2O3** | 6.785 | 0.02 | 6.78 | 0.288 | -1.141 | 25 | **Fe2O3** | 13.748 | 0.035 | 13.77 | 0.254 | -0.409 | 23 |
| **MnO** | 0.1 | 0.001 | 0.1004 | 0.581 | -1.529 | 25 | **MnO** | 0.197 | 0.001 | 0.197 | 0.259 | 0.243 | 23 |
| **TiO2** | 1.045 | 0.003 | 1.051 | 0.294 | -1.744 | 25 | **TiO2** | 2.246 | 0.007 | 2.265 | 0.303 | -1.084 | 23 |
| **CaO** | 5.254 | 0.02 | 5.15 | 0.381 | 0.749 | 25 | **CaO** | 7.097 | 0.016 | 7.114 | 0.219 | -0.489 | 23 |
| **K2O** | 2.92 | 0.011 | 2.898 | 0.384 | -0.461 | 25 | **K2O** | 1.773 | 0.005 | 1.774 | 0.293 | -0.267 | 23 |
| **P2O5** | 0.486 | 0.003 | 0.483 | 0.691 | -0.663 | 25 | **P2O5** | 0.356 | 0.002 | 0.3593 | 0.573 | -1.159 | 23 |
| **SiO2** | 59.91 | 0.338 | 59.14 | 0.563 | 0.049 | 25 | **SiO2** | 53.97 | 0.226 | 54.00 | 0.419 | -0.302 | 23 |
| **Al2O3** | 17.099 | 0.102 | 17.03 | 0.595 | -0.833 | 25 | **Al2O3** | 13.465 | 0.045 | 13.48 | 0.333 | -0.354 | 23 |
| **MgO** | 1.793 | 0.011 | 1.8 | 0.595 | -1.635 | 25 | **MgO** | 3.58 | 0.013 | 3.60 | 0.355 | -0.782 | 23 |
| **Na2O** | 4.269 | 0.033 | 4.204 | 0.767 | 0.28 | 25 | **Na2O** | 3.177 | 0.019 | 3.12 | 0.588 | 1.562 | 23 |
| **BaO** | 0.127 | 0 | 0.128 | 0.344 | -1.123 | 25 | **BaO** | 0.075 | 0 | 0.08 | 0.564 | -2.373 | 23 |
|  |  |  | **BHVO-2** |  |  |  |  |  |  | **GSP-2** |  |  |  |
|  | **Average (N samples)** | **St. Dev.** | **Recommended value** | **CV (%)** | **Delta (%)** | **N** |  | **Average (N samples)** | **St. Dev.** | **Recommended value** | **CV (%)** | **Delta (%)** | **N** |
| **Fe2O3** | 12.295 | 0.03 | 12.39 | 0.246 | -0.766 | 25 | **Fe2O3** | 4.906 | 0.011 | 4.961 | 0.223 | -1.11 | 25 |
| **MnO** | 0.169 | 0 | 0.169 | 0.258 | -0.142 | 25 | **MnO** | 0.041 | 0.001 | 0.041 | 1.232 | -0.976 | 25 |
| **TiO2** | 2.728 | 0.007 | 2.731 | 0.263 | -0.098 | 25 | **TiO2** | 0.663 | 0.002 | 0.668 | 0.263 | -0.79 | 25 |
| **CaO** | 11.307 | 0.035 | 11.4 | 0.307 | -0.815 | 25 | **CaO** | 2.107 | 0.007 | 2.213 | 0.346 | -4.782 | 25 |
| **K2O** | 0.509 | 0.002 | 0.513 | 0.384 | -0.764 | 25 | **K2O** | 5.422 | 0.019 | 5.457 | 0.346 | -0.65 | 25 |
| **P2O5** | 0.265 | 0.002 | 0.268 | 0.597 | -0.94 | 25 | **P2O5** | 0.29 | 0.002 | 0.294 | 0.536 | -1.293 | 25 |
| **SiO2** | 49.376 | 0.239 | 49.599 | 0.484 | -0.45 | 25 | **SiO2** | 66.933 | 0.295 | 67.429 | 0.441 | -0.736 | 25 |
| **Al2O3** | 13.444 | 0.065 | 13.44 | 0.484 | 0.027 | 25 | **Al2O3** | 14.997 | 0.071 | 15.086 | 0.473 | -0.587 | 25 |
| **MgO** | 7.187 | 0.038 | 7.257 | 0.534 | -0.965 | 25 | **MgO** | 0.965 | 0.006 | 0.972 | 0.622 | -0.695 | 25 |
| **Na2O** | 2.213 | 0.016 | 2.219 | 0.722 | -0.279 | 25 | **Na2O** | 2.832 | 0.02 | 2.815 | 0.706 | 0.62 | 25 |
| **BaO** | 0.014 | 0 | 0.015 | 2.875 | -2.74 | 25 | **BaO** | 0.15 | 0.001 | 0.152 | 0.389 | -0.673 | 25 |

Precision (given as 1 RSD) and accuracy (difference between [the measured value-reference value]/reference value) *100%. The reference values are derived from Jochum et al., 2016 and the values published on georem.mpch-mainz.de.

**Table S2.2b. Precision and accuracy of trace-elements measured by WD-XRF.**

|  |  |  | **AGV-2** |  |  |  |  |  |  | **BCR-2** |  |  |  |
| --- | --- | --- | --- | --- | --- | --- | --- | --- | --- | --- | --- | --- | --- |
|  | **Average (N)** | **St. Dev.** | **Recommended** | **CV (%)** | **Delta (%)** | **N** |  | Average (N) | St. Dev. | Recommended | CV (%) | Delta (%) | N |
| **Sc** | 18.5 | 0.41 | 13.11 | 2.24 | 41.11 | 18 | **Sc** | 37.16 | 0.84 | 33.53 | 2.25 | 10.83 | 18 |
| **V** | 113.13 | 1.74 | 118.5 | 1.54 | -4.53 | 18 | **V** | 417.98 | 5.37 | 417.6 | 1.28 | 0.09 | 18 |
| **Cr** | 14.03 | 0.93 | 16.22 | 6.63 | -13.48 | 18 | **Cr** | 14.08 | 0.87 | 15.85 | 6.2 | -11.15 | 18 |
| **Mn** | 832.03 | 15.47 | 777 | 1.86 | 7.08 | 18 | **Mn** | 1551.91 | 22.42 | 1523 | 1.44 | 1.9 | 18 |
| **Co** | 15.2 | 0.5 | 15.46 | 3.29 | -1.68 | 18 | **Co** | 35.19 | 0.89 | 37.33 | 2.52 | -5.72 | 18 |
| **Ni** | 16.95 | 0.55 | 18.87 | 3.27 | -10.17 | 18 | **Ni** | 11.48 | 0.35 | 12.57 | 3.05 | -8.64 | 18 |
| **Cu** | 56.54 | 1.81 | 51.51 | 3.2 | 9.76 | 18 | **Cu** | 20.37 | 1.13 | 19.66 | 5.54 | 3.59 | 18 |
| **Zn** | 97.97 | 2.65 | 86.7 | 2.71 | 13 | 18 | **Zn** | 144.78 | 2.59 | 129.5 | 1.79 | 11.8 | 18 |
| **Ga** | 21.91 | 0.94 | 20.42 | 4.3 | 7.28 | 18 | **Ga** | 24.43 | 0.87 | 22.07 | 3.57 | 10.71 | 18 |
| **Rb** | 67.36 | 2.79 | 67.79 | 4.14 | -0.64 | 18 | **Rb** | 46.79 | 1.79 | 46.02 | 3.83 | 1.68 | 18 |
| **Sr** | 626.85 | 19.74 | 659.5 | 3.15 | -4.95 | 18 | **Sr** | 324.84 | 9.48 | 337.4 | 2.92 | -3.72 | 18 |
| **Y** | 18.16 | 0.76 | 19.14 | 4.2 | -5.14 | 18 | **Y** | 32.78 | 1.2 | 36.07 | 3.65 | -9.11 | 18 |
| **Zr** | 230.91 | 7.65 | 232 | 3.31 | -0.47 | 18 | **Zr** | 184.71 | 5.74 | 186.5 | 3.11 | -0.96 | 18 |
| **Nb** | 12.33 | 0.53 | 14.12 | 4.34 | -12.65 | 18 | **Nb** | 11.14 | 0.39 | 12.44 | 3.49 | -10.46 | 18 |
| **Mo** | 2.04 | 0.18 | 2 | 8.75 | 2.22 | 18 | **Mo** | 228.67 | 5.91 | 250.6 | 2.58 | -8.75 | 18 |
| **Ba** | 1273.67 | 37.2 | 1134 | 2.92 | 12.32 | 18 | **Ba** | 761.96 | 18.55 | 683.9 | 2.44 | 11.41 | 18 |
| **La** | 50.34 | 4.22 | 38.21 | 8.39 | 31.74 | 18 | **La** | 37.24 | 3.69 | 25.08 | 9.9 | 48.48 | 18 |
| **Ce** | 72.99 | 2.85 | 69.43 | 3.91 | 5.13 | 18 | **Ce** | 59.24 | 2.98 | 53.12 | 5.02 | 11.52 | 18 |
| **Nd** | 32.79 | 1.74 | 30.49 | 5.3 | 7.56 | 18 | **Nd** | 32.21 | 1.65 | 28.26 | 5.13 | 13.96 | 18 |
| **Sm** | 3.89 | 2.05 | 6.55 | 52.65 | -40.6 | 18 | **Sm** | 5.1 | 1.91 | 6.55 | 37.36 | -22.1 | 18 |
| **Hf** | 6.13 | 0.69 | 5.14 | 11.3 | 19.4 | 18 | **Hf** | 6.09 | 0.86 | 4.97 | 14.07 | 22.46 | 18 |
| **Ta** | 0.45 | 0.38 | 0.79 | 83.93 | -42.68 | 18 | **Ta** | 0.04 | 0.54 | 0.79 | 1380.93 | -95.05 | 18 |
| **W** | 1.01 | 0.67 | 0.55 | 65.86 | 82.84 | 18 | **W** | 0.99 | 0.98 | 0.47 | 99.04 | 113.86 | 18 |
| **Pb** | 11.07 | 0.6 | 13.14 | 5.41 | -15.78 | 18 | **Pb** | 9.53 | 0.65 | 10.59 | 6.82 | -9.98 | 18 |
| **Th** | 9.35 | 0.81 | 6.17 | 8.65 | 51.44 | 18 | **Th** | 7.07 | 0.5 | 5.83 | 7.12 | 21.25 | 18 |
| **U** | 3.93 | 0.34 | 1.89 | 8.54 | 108.66 | 18 | **U** | 2.73 | 0.31 | 1.68 | 11.5 | 62.41 | 18 |
|  |  |  | **BHVO-2** |  |  |  |  |  |  | **GSP-2** |  |  |  |
|  | **Average (N)** | **St. Dev.** | **Recommended** | **CV (%)** | **Delta (%)** | **N** |  | **Average (N)** | **St. Dev.** | **Recommended** | **CV (%)** | **Delta (%)** | **N** |
| **Sc** | 40.48 | 0.72 | 31.83 | 1.77 | 27.17 | 18 | **Sc** | 7.89 | 0.45 | 22 | 5.75 | -64.14 | 18 |
| **V** | 307.83 | 3.04 | 318.2 | 0.99 | -3.26 | 18 | **V** | 47.08 | 0.75 | 52 | 1.6 | -9.47 | 18 |
| **Cr** | 298.34 | 3.2 | 287.2 | 1.07 | 3.88 | 18 | **Cr** | 19.69 | 0.58 | 20 | 2.97 | -1.56 | 18 |
| **Mn** | 1365.89 | 17.76 | 1309 | 1.3 | 4.35 | 18 | **Mn** | 323.01 | 5.95 | 314 | 1.84 | 2.87 | 18 |
| **Co** | 43.89 | 0.71 | 44.89 | 1.61 | -2.22 | 18 | **Co** | 6.24 | 0.43 | 7.3 | 6.89 | -14.54 | 18 |
| **Ni** | 119.79 | 1.31 | 119.8 | 1.09 | -0.01 | 18 | **Ni** | 15.14 | 0.36 | 17 | 2.36 | -10.95 | 18 |
| **Cu** | 132.86 | 2.37 | 129.3 | 1.78 | 2.75 | 18 | **Cu** | 41.79 | 1.07 | 43 | 2.56 | -2.82 | 18 |
| **Zn** | 115.56 | 2.38 | 103.9 | 2.06 | 11.22 | 18 | **Zn** | 124.37 | 1.76 | 120 | 1.42 | 3.64 | 18 |
| **Ga** | 22.8 | 0.73 | 15.46 | 3.21 | 47.48 | 18 | **Ga** | 23.47 | 0.72 | 22 | 3.09 | 6.67 | 18 |
| **Rb** | 9.54 | 0.36 | 9.26 | 3.74 | 3 | 18 | **Rb** | 234.19 | 7.2 | 245 | 3.08 | -4.41 | 18 |
| **Sr** | 368.77 | 9.9 | 394.1 | 2.68 | -6.43 | 18 | **Sr** | 224.12 | 4.82 | 240 | 2.15 | -6.62 | 18 |
| **Y** | 23.57 | 0.84 | 25.91 | 3.58 | -9.02 | 18 | **Y** | 23.42 | 0.62 | 28 | 2.63 | -16.35 | 18 |
| **Zr** | 165.83 | 4.76 | 171.2 | 2.87 | -3.13 | 18 | **Zr** | 552.01 | 14.6 | 550 | 2.64 | 0.36 | 18 |
| **Nb** | 16.28 | 0.54 | 18.1 | 3.3 | -10.07 | 18 | **Nb** | 23.89 | 0.55 | 27 | 2.32 | -11.5 | 18 |
| **Mo** | 3.7 | 0.21 | 0.07 | 5.71 | 5341.18 | 18 | **Mo** | 1.89 | 0.13 | 2.1 | 7.12 | -9.79 | 18 |
| **Ba** | 97.48 | 14.45 | 130.9 | 14.83 | -25.53 | 18 | **Ba** | 1458.19 | 31.07 | 1340 | 2.13 | 8.82 | 18 |
| **La** | 25.89 | 2.88 | 0.63 | 11.13 | 4029.01 | 18 | **La** | 195.32 | 5.27 | 180 | 2.7 | 8.51 | 18 |
| **Ce** | 40.09 | 2.45 | 37.53 | 6.12 | 6.83 | 18 | **Ce** | 408.28 | 5.96 | 410 | 1.46 | -0.42 | 18 |
| **Nd** | 26.58 | 1.41 | 24.27 | 5.31 | 9.53 | 18 | **Nd** | 202.24 | 2.33 | 200 | 1.15 | 1.12 | 18 |
| **Sm** | 4.83 | 1.97 | 6.02 | 40.85 | -19.75 | 18 | **Sm** | 22.41 | 1.9 | 27 | 8.5 | -17.02 | 18 |
| **Hf** | 5.37 | 0.74 | 0.58 | 13.84 | 821.79 | 18 | **Hf** | 14.65 | 0.96 | 14 | 6.54 | 4.64 | 18 |
| **Ta** | 0.66 | 0.74 | 1.15 | 112.61 | -43.19 | 18 | **Ta** | 0.22 | 0.52 | 0.8 | 240.74 | -72.92 | 18 |
| **W** | 1.09 | 0.86 | 0.25 | 78.69 | 336.03 | 18 | **W** | 0.92 | 0.64 | 0.34 | 69.54 | 169.26 | 18 |
| **Pb** | 0.36 | 0.37 | 1.65 | 103.55 | -78.49 | 18 | **Pb** | 40.39 | 1.81 | 42 | 4.47 | -3.84 | 18 |
| **Th** | 3.57 | 0.5 | 1.22 | 14.07 | 191.85 | 18 | **Th** | 108.48 | 3.95 | 105 | 3.64 | 3.32 | 18 |
| **U** | 1.47 | 0.34 | 0.41 | 22.92 | 257.34 | 18 | **U** | 3.54 | 0.32 | 2.4 | 9.15 | 47.45 | 18 |

Precision (given as 1 RSD) and accuracy (difference between the measured value-reference value/reference value) *100%. The reference values are derived from Jochum et al., 2016 and the values published on georem.mpch-mainz.de.
